# Supplementary material
Source: PubMed Central journal article supplement (PMC2898597)
Supplement: JCI41649sd.pdf [file JCI41649sd.pdf]

*Supplemental Table 1. Endothelial markers in sorted cells.*

| Endothelial Genes    |             | Signal Intensity        |         |                  |         |             |        |
|----------------------|-------------|-------------------------|---------|------------------|---------|-------------|--------|
| Common Name(s)       | Gene Symbol | CD31+ Endothelial Cells |         | GFP+ Osteoblasts |         | Fold Change |        |
| CD34 antigen         | Cd34        | 6,395                   | ± 1,121 | 757              | ± 447   | 8.4         | ± 1.5  |
| VE-cadherin, CD144   | cdh5        | 15,005                  | ± 1,561 | 393              | ± 98    | 38.1        | ± 4.0  |
| Endoglin, CD105      | Eng         | 13,849                  | ± 1,679 | 1,784            | ± 392   | 7.8         | ± 0.9  |
| VEGFR-1              | Flt1        | 11,349                  | ± 1,542 | 728              | ± 363   | 15.6        | ± 2.1  |
| VEGFR-2              | Kdr         | 16,756                  | ± 1,864 | 954              | ± 133   | 17.6        | ± 2.0  |
| PECAM-1, CD31        | Pecam1      | 866                     | ± 325   | Abs              |         | NA          |        |
| MECA-32              | Plvap       | 13,663                  | ± 1,875 | 2,821            | ± 1,075 | 4.8         | ± 0.7  |
| E-selectin           | Sele        | 753                     | ± 252   | 65               | ± 28    | 11.6        | ± 3.9  |
| P-selectin           | Selp        | 3,683                   | ± 1,094 | 498              | ± 121   | 7.4         | ± 2.2  |
| TIE-2                | Tek         | 6,950                   | ± 792   | 443              | ± 91    | 15.7        | ± 1.8  |
| VCAM-1               | Vcam1       | 11,963                  | ± 2,782 | 8,548            | ± 1,928 | 1.4         | ± 0.3  |
| VonWillebrand factor | Vwf         | 11,074                  | ± 4,690 | 424              | ± 276   | 26.1        | ± 11.1 |

Abs, gene called absent on chip. NA, not applicable.

*Supplemental Table 2. Osteoblast markers in sorted cells*

| Osteoblast Genes                    |             | Signal Intensity |          |                                     |         |             |       |
|-------------------------------------|-------------|------------------|----------|-------------------------------------|---------|-------------|-------|
| Common Name                         | Gene Symbol | GFP+ Osteoblasts |          | CD31 <sup>+</sup> Endothelial Cells |         | Fold Change |       |
| Alkaline phosphatase                | Alpl        | 10,448           | ± 1,525  | 2,109                               | ± 393   | 5.0         | ± 0.7 |
| Type I collagen                     | Col1a1      | 40,881           | ± 12,479 | 26,788                              | ± 6,605 | 1.5         | ± 0.5 |
| Bone sialoprotein (Bsp)             | Ibsp        | 28,787           | ± 12,877 | 10,966                              | ± 5,255 | 2.6         | ± 1.2 |
| Osteoglycin, mimecan                | Ogn         | 13,847           | ± 1,401  | 251                                 | ± 78    | 55.3        | ± 5.6 |
| Osteomodulin, osteoadherin          | Omd         | 10,020           | ± 2,687  | 600                                 | ± 357   | 16.7        | ± 4.5 |
| Periostin                           | Postn       | 38,346           | ± 8,306  | 1,575                               | ± 721   | 24.4        | ± 5.3 |
| Runt-related transcription factor 2 | Runx2       | 8,209            | ± 3,784  | 1,482                               | ± 368   | 5.5         | ± 2.6 |
| Osterix (Osx)                       | Sp7         | 3,870            | ± 2,083  | 1,640                               | ± 877   | 2.4         | ± 1.3 |
